# Supplementary material for: Parkinson’s disease and bacteriophages as its overlooked contributors
Source: PubMed Central journal article supplement (PMC6050259; doi:10.1038/s41598-018-29173-4), 2018-07-17
Supplement: 41598_2018_29173_MOESM8_ESM.pdf [file 41598_2018_29173_MOESM8_ESM.pdf]

## Parkinson's disease and bacteriophages as its overlooked contributors

George Tetz, Stuart M. Brown, Yuhan Hao, Victor Tetz

### Supplementary Table 5\*

Clinical characteristics and general demographic parameters of study participants

|                                                       | PD              | Control         | P value |
|-------------------------------------------------------|-----------------|-----------------|---------|
| Demographics                                          |                 |                 |         |
| n                                                     | 31              | 28              |         |
| Age (years, mean $\pm$ SD)                            | 64.8 $\pm$ 9.5  | 65.6 $\pm$ 10.4 | 0.970   |
| Clinical data                                         |                 |                 |         |
| UPDRS III (mean $\pm$ SD)                             | 12.6 $\pm$ 6.9  | 0 $\pm$ 0       | <0.001  |
| GIT symptoms incl. constipation (GSRS, mean $\pm$ SD) | 3.4 $\pm$ 2.9   | 2.2 $\pm$ 2.0   | 0.172   |
| Total serum bilirubin                                 | 0.23 $\pm$ 0.03 | 0.23 $\pm$ 0.03 | 0.593   |
| Nutritional habits                                    |                 |                 |         |
| Diet                                                  |                 |                 |         |
| Omnivorous                                            | 30 [96.8%]      | 28 [100%]       |         |
| Vegetarian                                            | 1 [3.2%]        | 0 [0%]          |         |
| Probiotics                                            | 4 [12.9%]       | 1 [3.6%]        |         |
| Medication                                            |                 |                 |         |
| Amantadine                                            | 26 [83.9%]      | 0 [0%]          |         |
| Dopamine agonist                                      | 11 [35.5%]      | 0 [0%]          |         |
| MAO inhibitor                                         | 28 [90.3%]      | 0 [0%]          |         |
| L-DOPA                                                | 0 [0%]          | 0 [0%]          |         |
| Statin intake                                         | 1 [3.2%]        | 11 [39.3%]      |         |
| Metformin                                             | 1 [3.2%]        | 3 [10.7%]       |         |
| Acetylsalicylic acid                                  | 2 [6.5%]        | 7 [25.0%]       |         |
| Smoking                                               |                 |                 |         |
| No                                                    | 10 [32.3%]      | 9 [32.1%]       |         |
| Yes                                                   | 5 [16.1%]       | 4 [14.3%]       |         |
| Ex-smoker                                             | 15 [48.4%]      | 15 [53.6%]      |         |

\*Originally from the work of Bedarf et al. 2016

UPDRS Unified Parkinson's Disease Rating Scale, GIT gastrointestinal, GSRS Gastrointestinal Symptoms Rating Scale, MAO monoamine oxidase, L-DOPA Levodopa
